# Supplementary material for: Quantitative chemical proteomics for investigating the biomarkers of dioscin against liver fibrosis caused by CCl4 in rats
Source: Royal Society of Chemistry journal article supplement (doi:10.1039/c4cc09160d), 2015-01-01
Supplement: c4cc09160d1.pdf [file c4cc09160d1.pdf]

## Supplemental Materials

### **Quantitative chemical proteomics for investigating the biomarkers of dioscin against liver fibrosis caused by CCl<sub>4</sub> in rats**

Xiaoling Zhang, Lina Xu, Lianhong Yin, Yan Qi, Youwei Xu, Xu Han, Jinyong Peng\*

*College of Pharmacy, Dalian Medical University, Western 9 Lvshunnan Road,*

*Dalian 116044, China*

Corresponding author,  
Dr. Jinyong Peng  
College of Pharmacy  
Dalian Medical University  
Dalian, China  
Tel.: +86 411 8611 0411  
Fax: +86 411 8611 0411  
Email: [jinyongpeng2005@163.com](mailto:jinyongpeng2005@163.com)

## **Supplementary materials and methods**

### ***Real-time PCR assay***

Total RNA from cells and livers was extracted using RNAiso Plus reagent following the manufacturer's protocols. RNA (1 µg) was reverse-transcribed using a PrimeScript® RT reagent Kit in a TC-512 PCR system (TECHNE, UK), and single-stranded cDNA was quantified using real-time PCR with SYBR® PremixEx Taq™II (Tli RNaseH Plus) in an ABI 7500 Real-Time PCR System (Applied Biosystems, USA). The primers used in the present work are listed in [Supplemental Table 1](#). A no-template control was analyzed in parallel with each gene, and the GAPDH gene was used as the housekeeping gene in our study. The unknown template was calculated using a standard curve for quantitative analysis.

### ***Western blotting assay***

Total protein was extracted from cells and livers tissues using an appropriate cold lysis buffer supplemented with 1 mM phenylmethylsulfonyl fluoride (PMSF), and the protein concentration was determined using a BCA protein assay kit (Beyotime Biotechnology, China). Samples were subjected to SDS-PAGE (10%-15%) and transferred onto a PVDF membrane (Millipore, USA). Membranes were blocked and incubated overnight at 4°C with the primary antibodies listed in [Supplemental Table 2](#). Membranes were incubated at room temperature with an appropriate secondary antibody, and proteins were detected using an enhanced chemiluminescence (ECL) method. Protein bands were imaged using a Bio-Spectrum Gel Imaging System (UVP, USA). Bands were normalized with GAPDH as an internal control.

### ***Investigation of dioscin-induced proteins alterations using proteomics***

Protein samples were extracted from rat livers of control, model and dioscin-treated groups, and were treated with liquid nitrogen and grinded into a uniformly powder. 1200  $\mu$ l Alklysis buffer (7M urea, 2M thiourea, 4% (W/V) CHAPs and PMSF) (Sigma, USA) was used for protein extraction. Samples were sonicated on ice (80 W, 0.8 s duration, 10 times, 0.8 s intervals, repeated six times), nucleic acid fragmentation, then centrifuged at 12000  $\times$  g for 20 min at 4°C. The supernatant was transferred to a new centrifuge tube, and four volumes of acetone was added, then precipitated overnight at -20°C, and centrifuged at 12000  $\times$  g for 20 min at 4°C, then the precipitate were collected and stored at -80°C. After the protein quantification by BCA assay, the concentration of each sample protein was adjusted to 10  $\mu$ g/ml. Protein labeling and 2D-DIGE analysis were performed as the described method <sup>1</sup>. The sample proteins were labeled with CyDye DIGE Fluor (minimal dye) Labeling Kit (GE Healthcare, CT, USA). A 400 pmol of the sample dry was added per 50  $\mu$ g of sample. The investigation was performed in three biological duplicates. Equal amounts (25  $\mu$ g) of proteins from the test samples were pooled together as the internal standards and labeled with Cy2. And 50  $\mu$ g of protein from control, model and dioscin were labeled with Cy3 and Cy5. The labeling reactions were performed on ice in the dark for 30 min, and then quenched with 50-fold molar excess of free lysine to dye for 10 min on ice. Immobilized pH gradient (IPG) strip (24 cm, pH 4-7) (GE Healthcare, CT, USA) were rehydrated with a mixture of 120  $\mu$ g Cy-labeled samples in immobile drystrip rewelling tray overnight at 20°C. The first-dimension isoelectric focusing (IEF) was performed at 20°C, using voltages and running times as follows: S1 stp 300 V 30 min; S2 stp 700 V 30 min; S3 stp 1500 V 30 min; S4 grd 9000 V 3 h; S5 stp 9000 V 4 h. After IEF, gel strips were incubated in equilibration solution

(50 mM Tris/HCl, pH 8.8, 6 M urea, 30% Glycerol, 2% SDS, 0.002% Bromophenol blue, 100 mM DTT) for 15 min, followed by 15 min incubation away from light with equilibration solution where the DTT was substituted by 250 mM iodoacetamide. Equilibrated IPG strips were transferred onto 12.5% uniform polyacrylamide gel and overlaid with 0.5% agarose solution. SDS-PAGE was carried out using Ettan™ DALT six (GE, Healthcare), and performed at 2W/gel for 45 min, followed by 17 W/gel until the bromophenol blue dye front had run off the bottom of the gels. After second-dimension SDS-PAGE, gels were scanned at a resolution of 100 microns on a Typhoon 9400 variable mode imager (GE Healthcare). Cy2-, Cy3- and Cy5-dye images of each gel were acquired at excitation/emission values of 488/520, 523/580 and 633/670 nm, respectively. Image analysis was performed using the Image-Master 2D Platinum 7 (GE Healthcare), and analysis of variance (ANOVA) was applied to matched spots and the data were filtered to retain protein spots with  $p \leq 0.05$  determined by 1-way ANOVA and a fold-change of  $\geq 1.5$ . Preparative 2D PAGE gels were set up by loading 1200  $\mu\text{g}$  of protein extract into 24 cm IPG strips, which were then focused and subjected to 2-DE electrophoresis as described above. And the gel was subjected to mass-compatible silver staining in order to track the spots to be excised for protein identification. Proteins spots with significant change were excised from preparative gels that matched with the 2D-DIGE image, and subjected to digestion with trypsin (Promega). The peptides resulting from tryptic digestion were subsequently desalted for MALDI-TOF/TOF MS (Ultraflex III TOF/TOF, Bruker Dalton) analysis. In the survey full scan MS spectra (from 700 Da to 3200 Da), the UV wavelength was set at 355 nm, the repetition rate was set 200 Hz, and acceleration voltage of 20000V, the optimal resolution mass was 1500Da. The flexAnalysis

software (Bruker Dalton) was used to filter baseline peak and identify signal peaks. And the protein identification was done via Bio Tools (Bruker Dalton) software against NCBI database.

## **References**

- 1 B. T. Sun, L. H. Zheng, Y. L. Bao, C. L. Yu, Y. Wu, X. Y. Meng and Y. X. Li, *Eur. J. Pharmacol.*, 2011, 654, 129–134.

**Supplemental Table 1** The primer sequences used for real-time PCR assay

| Gene          | GenBank accession | Primers (5'-3')                                                       |
|---------------|-------------------|-----------------------------------------------------------------------|
| $\alpha$ -SMA | NM_031004         | Forward: AGCCAGTCGCCATCAGGAAC<br>Reverse: GGGAGCATCATCACCAGCAA        |
| COL1A1        | NM_053304         | Forward: GACATGTTTCAGCTTTGTGGACCC<br>Reverse: AGGGACCCTTAGGCCATTGTGTA |
| COL3A1        | NM_032085         | Forward: TTTGGCACAGCAGTCCAATGTA<br>Reverse: GACAGATCCCGAGTCGCAGA      |
| GAPDH         | NM_017008.3       | Forward: GGCACAGTCAAGGCTGAGAATG<br>Reverse: ATGGTGGTGAAGACGCCAGTA     |

**Supplemental Table 2** The differentially expressed proteins from rat livers identified by proteomics

| Spot | Gene name      | Protein name                                           | Scores | Nominal mass (M <sub>r</sub> ) | pI value | Sequence Coverage |
|------|----------------|--------------------------------------------------------|--------|--------------------------------|----------|-------------------|
| A10  | EST3           | Liver carboxylesterase 3                               | 81     | 61961                          | 5.63     | 8%                |
| A11  | PDIA3          | Protein disulfide-isomerase A3                         | 231    | 57044                          | 5.88     | 18%               |
| A13  | PDIA3          | Protein disulfide-isomerase A3                         | 86     | 57044                          | 5.88     | 18%               |
| A19  | SBP1           | Selenium-binding protein 1                             | 317    | 53069                          | 6.1      | 36%               |
| A22  | ALDH2          | Aldehyde dehydrogenase, mitochondrial                  | 259    | 56966                          | 6.63     | 11%               |
| A23  | AL9A1          | 4-trimethylaminobutyraldehyde dehydrogenase            | 194    | 54530                          | 6.57     | 25%               |
| A25  | GSHB           | Glutathione synthetase                                 | 376    | 52597                          | 5.48     | 36%               |
| A38  | SUCB2          | Succinyl-CoA ligase subunit beta, mitochondrial        | 110    | 47096                          | 6.58     | 18%               |
| A39  | SUCB2          | Succinyl-CoA ligase subunit beta, mitochondrial        | 321    | 47096                          | 6.58     | 21%               |
| A48  | ARK72          | Aflatoxin B1 aldehyde reductase member 2               | 164    | 41105                          | 8.35     | 22%               |
| A52  | ALDR           | Aldose reductase                                       | 158    | 36230                          | 6.26     | 27%               |
| A54  | GPDA           | Glycerol-3-phosphate dehydrogenase [NAD+], cytoplasmic | 312    | 38112                          | 6.16     | 46%               |
| A55  | CK054          | Ester hydrolase C11 or f54 homolog                     | 96     | 35427                          | 6.16     | 29%               |
| A56  | RGN            | Regucalcin                                             | 321    | 33939                          | 5.27     | 49%               |
| A57  | HMCS2          | Hydroxymethylglutaryl-CoA synthase, mitochondrial      | 248    | 57332                          | 8.86     | 21%               |
| A59  | CSAD           | Cysteine sulfinic acid decarboxylase                   | 254    | 55841                          | 6.84     | 19%               |
| A68  | ST1E1          | Estrogen sulfotransferase, isoform 1                   | 184    | 35828                          | 5.78     | 35%               |
| B05  | HEMO           | Hemopexin                                              | 183    | 52060                          | 7.58     | 19%               |
| B09  | HEMO           | Hemopexin                                              | 108    | 52060                          | 7.58     | 22%               |
| B16  | KNT2           | T-kininogen 2                                          | 148    | 48757                          | 5.94     | 13%               |
| B18  | ALBU           | Serum albumin                                          | 379    | 70682                          | 6.09     | 39%               |
| B24  | KNT1           | T-kininogen 1                                          | 236    | 48828                          | 6.08     | 5%                |
| B35  | PDIA1          | Protein disulfide-isomerase                            | 234    | 57315                          | 4.82     | 20%               |
| B40  | CALR           | Calreticulin                                           | 231    | 48137                          | 4.33     | 23%               |
| B41  | A1AT           | Alpha-1-antiproteinase                                 | 102    | 46278                          | 5.7      | 16%               |
| B49  | A1AT           | Alpha-1-antiproteinase                                 | 248    | 46278                          | 5.7      | 27%               |
| B56  | GSHB           | Glutathione synthetase                                 | 264    | 52597                          | 5.48     | 33%               |
| B60  | Not identified |                                                        |        |                                |          |                   |

|      |                |                                      |     |       |      |     |
|------|----------------|--------------------------------------|-----|-------|------|-----|
| B61  | K2C8           | Keratin, type II cytoskeletal 8      | 441 | 53985 | 5.83 | 48% |
| B63  | K2C8           | Keratin, type II cytoskeletal 8      | 155 | 53985 | 5.83 | 18% |
| B64  | Not identified |                                      |     |       |      |     |
| B66  | VIME           | Vimentin                             | 190 | 53757 | 5.06 | 38% |
| B69  | RCN1           | Reticulocalbin-1                     | 186 | 38090 | 4.7  | 26% |
| B71  | K1C18          | Keratin, type I cytoskeletal 18      | 276 | 47732 | 5.07 | 35% |
| B72  | HSP7C          | Keratin, type I cytoskeletal 18      | 171 | 71055 | 5.37 | 13% |
| B74  | K1C19          | Heat shock cognate 71 kDa protein    | 190 | 44609 | 5.21 | 48% |
| B76  | ACTB           | Keratin, type I cytoskeletal 19      | 348 | 42052 | 5.29 | 26% |
| B77  | K2C8           | Actin, cytoplasmic 1                 | 193 | 53985 | 5.83 | 22% |
| B90  | HPT            | Haptoglobin                          | 145 | 39052 | 6.1  | 19% |
| B96  | EFHD2          | EF-hand domain-containing protein D2 | 413 | 26743 | 5.01 | 43% |
| B98  | ANXA5          | Annexin A5                           | 478 | 35779 | 4.93 | 39% |
| B102 | HSPB1          | Heat shock protein beta-1            | 422 | 22936 | 6.12 | 51% |
| B104 | HSPB1          | Heat shock protein beta-1            | 145 | 22936 | 6.12 | 31% |
| B107 | Not identified |                                      |     |       |      |     |
| B109 | APOA1          | Apolipoprotein A-I                   | 203 | 30100 | 5.52 | 47% |
| B111 | STMN1          | Stathmin                             | 129 | 17278 | 5.76 | 30% |
| B112 | MYL6           | Myosin light polypeptide 6           | 154 | 17135 | 4.46 | 25% |
| B113 | COTL1          | Coactosin-like protein               | 172 | 16036 | 5.28 | 47% |



**Supplemental Table 3** The information of the antibodies used in the present work

| Antibody   | Source | Dilutions | Company                         |
|------------|--------|-----------|---------------------------------|
| PDIA3      | rabbit | 1: 1000   | Proteintech Group, Chicago, USA |
| SELENBP1   | rabbit | 1: 1000   | Bioworld Technology, USA        |
| GSS        | rabbit | 1: 1000   | Bioworld Technology, USA        |
| RGN        | rabbit | 1: 1000   | Proteintech Group, Chicago, USA |
| Hemopexin  | rabbit | 1: 1000   | Bioworld Technology, USA        |
| Keratin 8  | rabbit | 1: 1000   | Proteintech Group, Chicago, USA |
| Vimentin   | rabbit | 1: 1000   | Proteintech Group, Chicago, USA |
| Keratin 18 | rabbit | 1: 1000   | Proteintech Group, Chicago, USA |
| ANXA5      | rabbit | 1: 1000   | Proteintech Group, Chicago, USA |
| DPT        | rabbit | 1: 1000   | Proteintech Group, Chicago, USA |
| GAPDH      | rabbit | 1: 1000   | Proteintech Group, Chicago, USA |

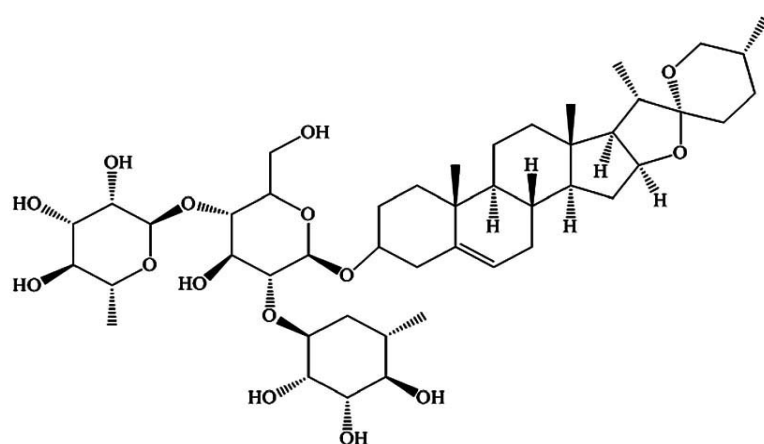

**Supplemental Fig. 1** The chemical structure of dioscin.

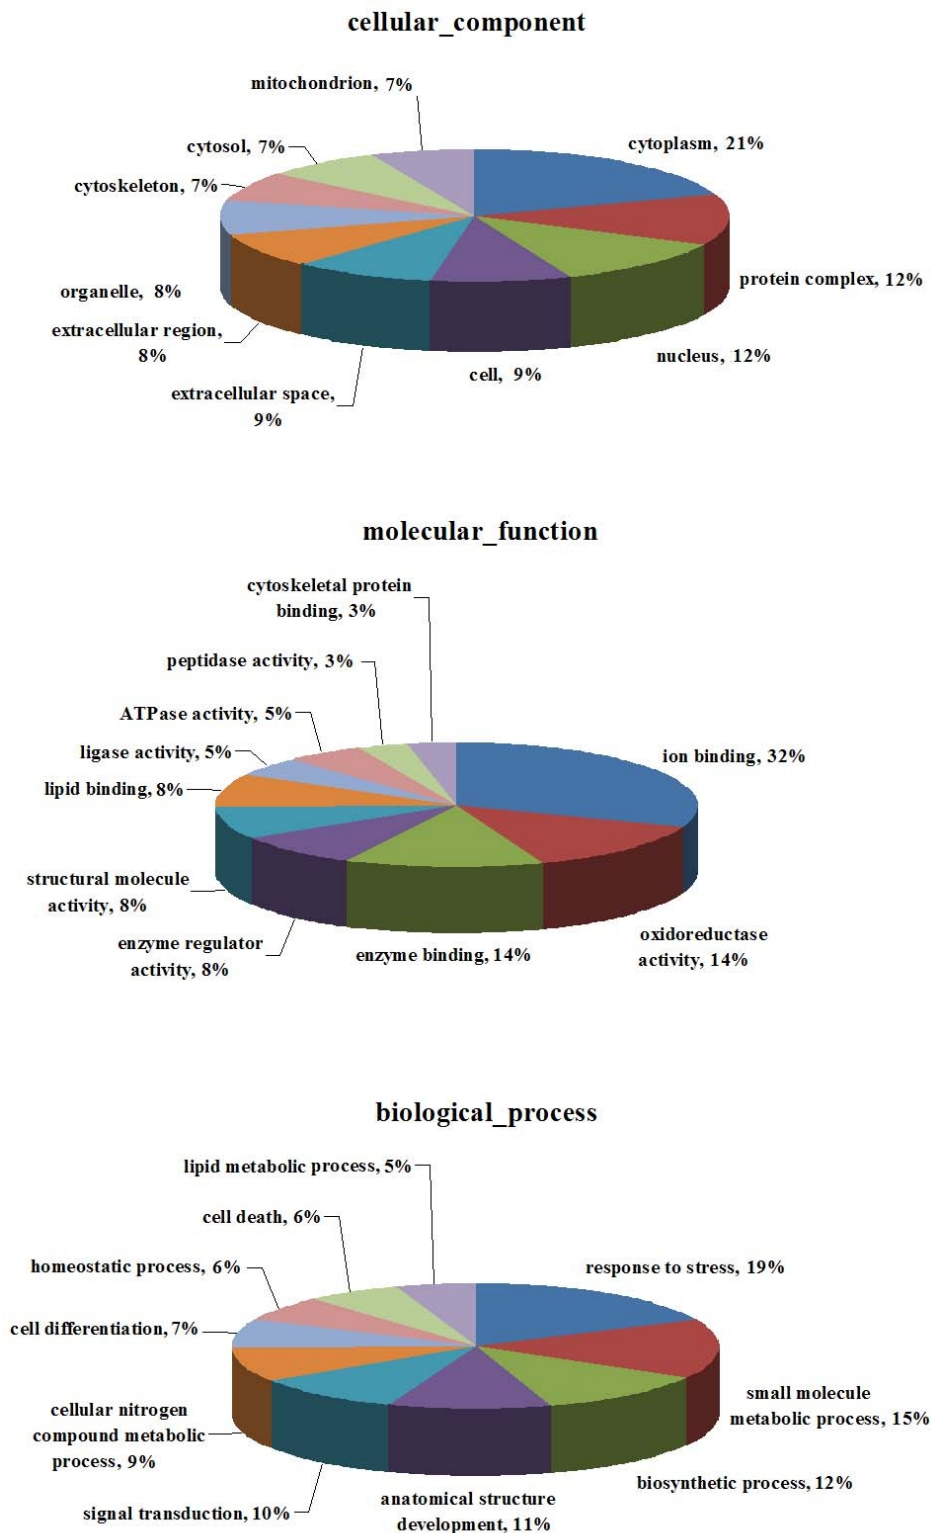

**Supplemental Fig. 2** Classification of the differentially expressed proteins identified by proteomics according to the cellular component, molecular function and biological process by Gene Ontology (GO) analysis.

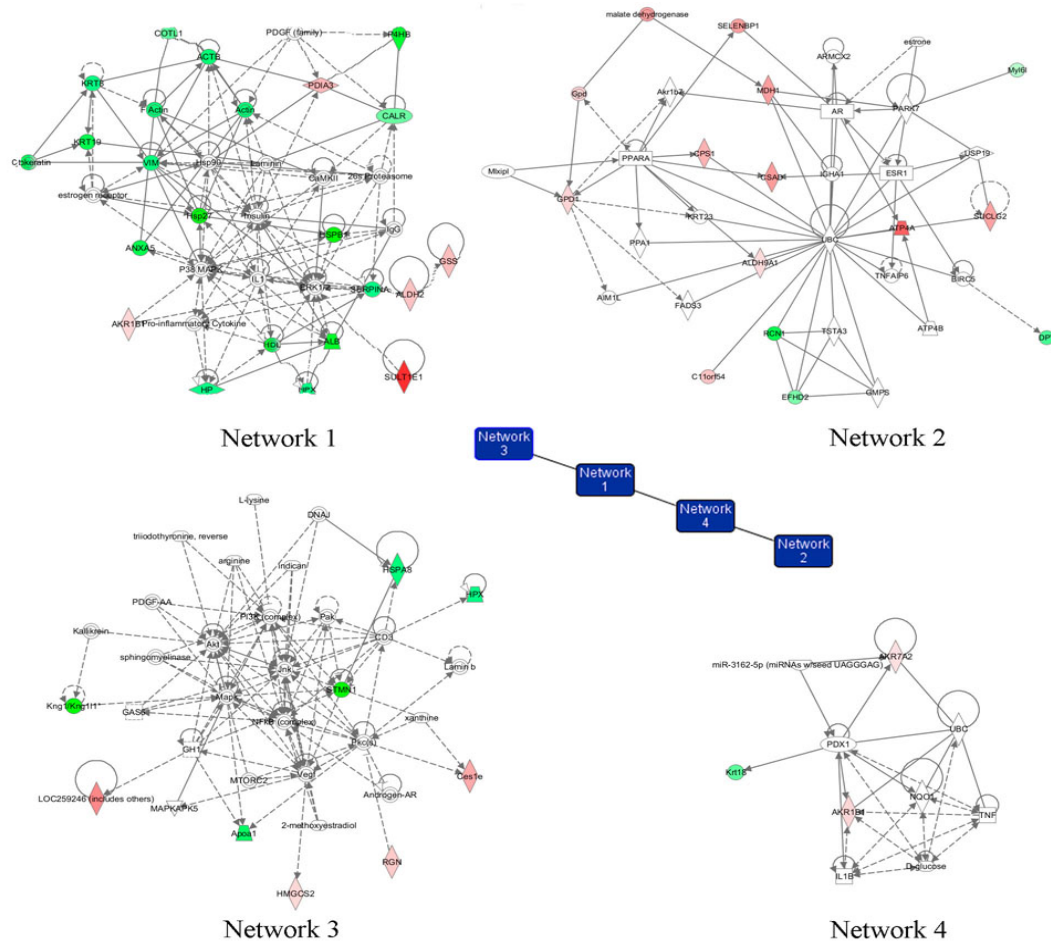

**Supplemental Fig. 3** The regulation networks of the differentially expressed proteins caused by dioscin to treat liver fibrosis in rats based on IPA analysis. Each node represents one protein and the direct (represented by solid lines) and indirect (represented by dotted lines) association with other proteins. Proteins with red color represent up-regulation, and those with green color indicate down-regulation in the study. Moreover, the deeper color is, the larger difference will be.

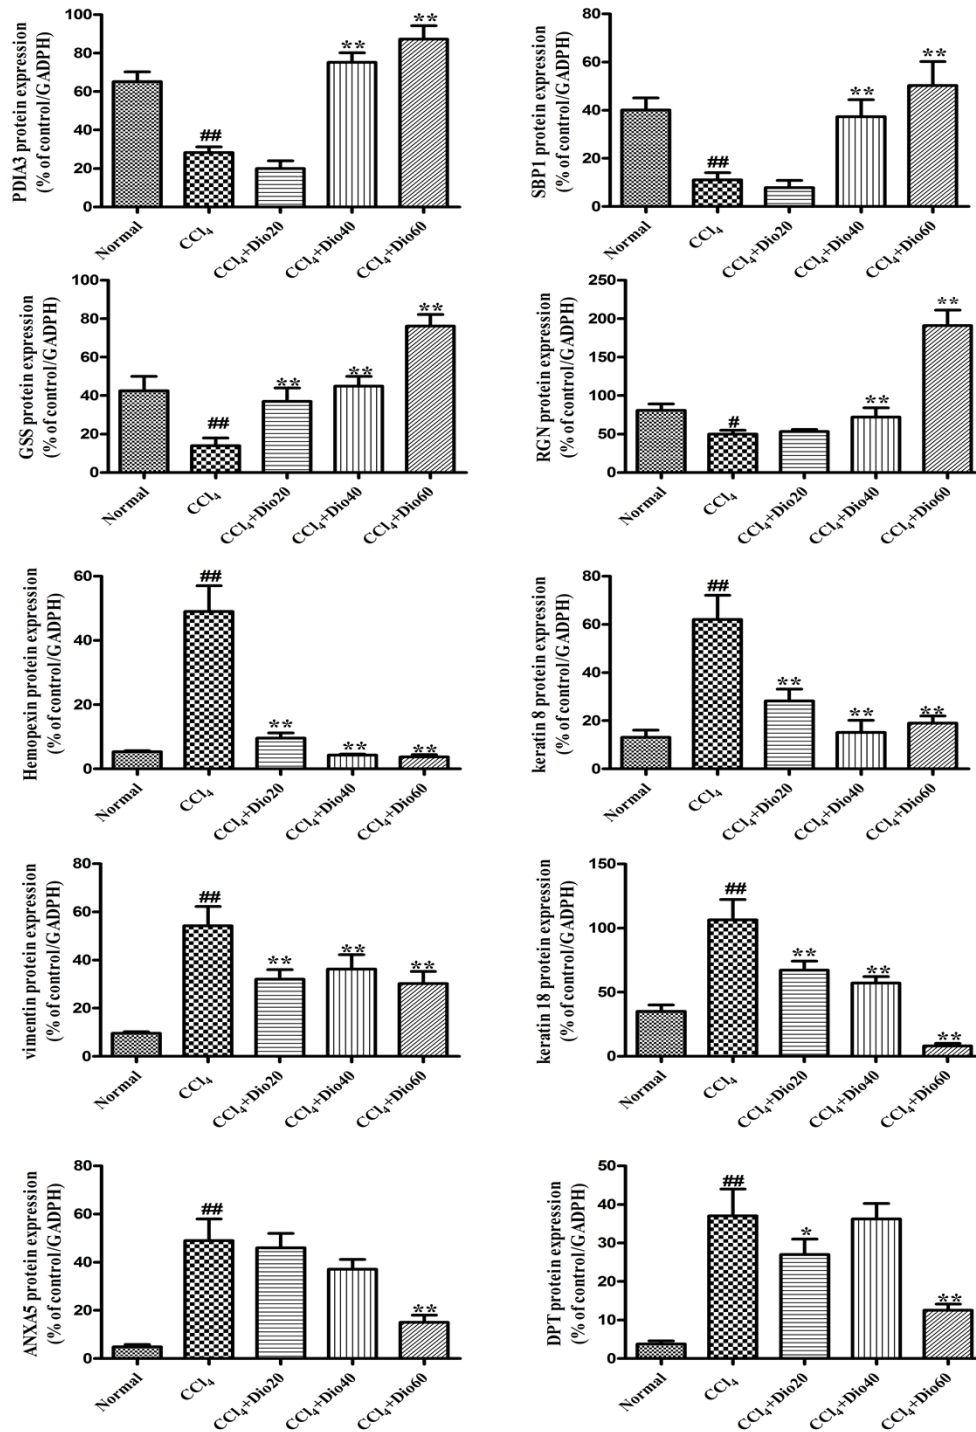

**Supplemental Fig. 4** Western blot analysis of PDIA3, SBP1, GSS, RGN, hemopexin, keratin 8, keratin 18, vimentin, ANXA5 and DPT in rat livers. Values are expressed as the mean  $\pm$  SD (n = 3). \*p < 0.05, \*\*p < 0.01 vs. CCl<sub>4</sub>-treated group; #p < 0.01, ##p < 0.01 vs. normal group.
